# Supplementary material
Source: PubMed Central journal article supplement (PMC4417549)
Supplement: NIHMS679534-supplement-01.pdf [file NIHMS679534-supplement-01.pdf]

**Table E1.** Definition of Response of Liver Metastases in Treated Lobe(s)

| Response | Description                                                                                                                                                                                                      |
|----------|------------------------------------------------------------------------------------------------------------------------------------------------------------------------------------------------------------------|
| CR       | Disappearance of all target and nontarget liver lesions                                                                                                                                                          |
| PR       | > 30% decrease in sum of longest diameters relative to baseline sum with at least stable nontarget liver lesions                                                                                                 |
| SD       | Absence of change that would qualify as response or progression                                                                                                                                                  |
| PD       | > 20% increase in sum of longest diameters in target liver lesions or unequivocal progression of nontarget liver lesions in treated lobe(s); appearance of $\geq 1$ new liver lesions > 10 mm in treated lobe(s) |

Note—To be assigned a status of CR or PR, changes in tumor measurements must be confirmed by the follow-up assessment using the same imaging test at a minimum interval of 4 weeks. Patients with CR or PR without confirmatory assessment will be categorized as having SD. In the case of SD, follow-up measurements must have met the SD criteria at least once at a minimum interval of 4 weeks. Patients with SD without confirmatory assessment will be categorized as having PD.

CR = complete response, PD = progressive disease, PR = partial response, SD = stable disease.

**Table E2.** Evaluation of Target and Nontarget Lesions in Treated Liver Lobe(s)

| Target Liver Lesions | Nontarget Liver Lesions | New Liver Lesions in Treated Lobes | Overall Liver Response |
|----------------------|-------------------------|------------------------------------|------------------------|
| CR                   | CR                      | No                                 | CR                     |
| CR                   | SD                      | No                                 | PR                     |
| PR                   | Non-PD                  | No                                 | PR                     |
| SD                   | Non-PD                  | No                                 | SD                     |
| PD                   | Any                     | Yes or no                          | PD                     |
| Any                  | PD                      | Yes or no                          | PD                     |
| Any                  | Any                     | Yes                                | PD                     |

CR = complete response, PD = progressive disease, PR = partial response, SD = stable disease.

**Table E3.** Summary of OS and Local and Systemic PFS in Each Treatment Arm

| Survival          | Immunoembolization (mo) |                                  |                                      | Bland Embolization (mo) |                                  |                                       |
|-------------------|-------------------------|----------------------------------|--------------------------------------|-------------------------|----------------------------------|---------------------------------------|
|                   | All (n = 25)            | Liver Involvement < 20% (n = 16) | Liver Involvement $\geq$ 20% (n = 9) | All (n = 27)            | Liver Involvement < 20% (n = 16) | Liver Involvement $\geq$ 20% (n = 11) |
| Local PFS (mo)    | 3.9 (3.5–4.9)           | 3.7 (0–7.3)                      | 5.0 (2.9–7.0)                        | 5.9 (5.5–6.2)           | 7.2 (4.0–9.0)                    | 5.7 (3.4–7.9)                         |
| Systemic PFS (mo) | 10.4 (7.5–13.2)         | 11.5 (5.7–16.2)                  | 9.2 (0.1–18.2)                       | 7.1 (5.0–9.1)           | 7.9 (7.2–8.3)                    | 5.9 (3.4–8.3)                         |
| OS (mo)           | 21.5 (18.5–24.8)        | 21.7 (20.1–23.2)                 | 18.2 (16.7–19.6)                     | 17.2 (11.9–22.4)        | 21.7 (16–25.8)                   | 16.0 (8.2–23.7)                       |

Note—Values presented as median (95% confidence interval).

OS = overall survival, PFS = progression-free survival.

**Table E4.** Multivariate Analysis of Clinical Outcome Predictors (N = 52)

| Covariate                               | HR   | 95% CI    | P Value |
|-----------------------------------------|------|-----------|---------|
| Overall survival                        |      |           |         |
| Elevated LDH                            | 3.50 | 1.50–8.17 | .004    |
| Liver involvement ≥ 20%                 | –    | –         | .012    |
| IE                                      | –    | –         | .16     |
| Liver involvement/treatment interaction |      |           | .042    |
| Liver ≥ 20% vs < 20% with BE            | 3.34 | 1.30–8.58 | .012    |
| Liver ≥ 20% vs < 20% with IE            | 0.87 | 0.38–1.99 | .73     |
| IE vs BE at liver < 20%                 | 1.77 | 0.80–3.89 | .16     |
| IE vs BE at liver ≥ 20%                 | 0.46 | 0.18–1.20 | .11     |
| Systemic PFS                            |      |           |         |
| PR as best radiologic response          | 0.35 | 0.14–0.88 | .025    |
| Elevated LDH                            | 3.13 | 1.36–7.16 | .007    |
| Liver involvement ≥ 20%                 | 1.90 | 1.05–3.47 | .035    |
| Hepatic PFS                             |      |           |         |
| Male sex                                | 1.98 | 1.01–3.88 | .046    |
| Liver involvement ≥ 20%                 | –    | –         | .13     |
| IE                                      | –    | –         | .001    |
| Liver involvement/treatment interaction |      |           | .004    |
| Liver ≥ 20% vs < 20% with BE            | 1.90 | 0.83–4.37 | .13     |
| Liver ≥ 20% vs < 20% with IE            | 0.31 | 0.13–0.76 | .010    |
| IE vs BE at liver < 20%                 | 4.26 | 1.83–9.93 | .001    |
| IE vs BE at liver ≥ 20%                 | 0.69 | 0.28–1.71 | .42     |

BE = bland embolization, CI = confidence interval, HR = hazard ratio, IE = immunoembolization, LDH = lactate dehydrogenase, PFS = progression-free survival, PR = partial response.

**Table E5.** Results from Univariate and Multivariate Regression Models for Log-Transformed PFS-S

| Cytokine              | Slope | 95% CI        | P Value |
|-----------------------|-------|---------------|---------|
| Univariate            |       |               |         |
| TNF- $\alpha$ at 1 h  | 0.70  | 0.43–0.97     | < .001  |
| IL-6 at 1 h           | 0.21  | 0.12–0.29     | < .001  |
| IL-8 at 1 h           | 0.25  | –0.04 to 0.54 | .101    |
| GM-CSF at 1 h         | 0.13  | –0.60 to 0.87 | .726    |
| TNF- $\alpha$ at 18 h | 0.45  | 0.10–0.80     | .020    |
| IL-6 at 18 h          | 0.02  | –0.13 to 0.16 | .841    |
| IL-8 at 18 h          | 0.47  | 0.24–0.70     | .001    |
| GM-CSF at 18 h        | 0.06  | –0.23 to 0.36 | .684    |
| Multivariate          |       |               |         |
| IL-6 at 1 h           | 0.154 | 0.073–0.236   | .001    |
| IL-8 at 18 h          | 0.431 | 0.238–0.625   | < .001  |

CI = confidence interval, GM-CSF = granulocyte–macrophage colony-stimulating factor, IL = interleukin, TNF = tumor necrosis factor.

**Table E6.** Results from Univariate and Multivariate Regression Models for Log-Transformed OS

| Cytokine              | Slope  | 95% CI          | P Value |
|-----------------------|--------|-----------------|---------|
| Univariate            |        |                 |         |
| TNF- $\alpha$ at 1 h  | 0.119  | –0.466 to 0.705 | .694    |
| IL-6 at 1 h           | 0.010  | –0.102 to 0.123 | .859    |
| IL-8 at 1 h           | –0.190 | –0.385 to 0.005 | .069    |
| GM-CSF at 1 h         | 0.316  | –0.041 to 0.672 | .097    |
| TNF- $\alpha$ at 18 h | 0.140  | –0.426 to 0.707 | .633    |
| IL-6 at 18 h          | 0.011  | –0.050 to 0.072 | .728    |
| IL-8 at 18 h          | 0.180  | 0.049–0.311     | .013    |
| GM-CSF at 18 h        | –0.005 | –0.205 to 0.196 | .965    |
| Multivariate          |        |                 |         |
| GM-CSF at 1 h         | 9.303  | 1.065–17.542    | .039    |
| IL-8 at 18 h          | 0.187  | 0.031–0.343     | .029    |

CI = confidence interval, GM-CSF = granulocyte–macrophage colony-stimulating factor, IL = interleukin, TNF = tumor necrosis factor.
